# Supplementary material
Source: PubMed Central journal article supplement (PMC4658252)
Supplement: NIHMS704911-supplement-1.pdf [file NIHMS704911-supplement-1.pdf]

**Table S1.** Search strategies.

| <b>PubMed</b>                                                                                                                                                                                                                                                                                                                                           | <b>EMBASE</b>                                                                                                                                                                                                                                                                                                                                       |
|---------------------------------------------------------------------------------------------------------------------------------------------------------------------------------------------------------------------------------------------------------------------------------------------------------------------------------------------------------|-----------------------------------------------------------------------------------------------------------------------------------------------------------------------------------------------------------------------------------------------------------------------------------------------------------------------------------------------------|
| ("quality of life" OR quality of life[mesh] OR symptom OR<br>"patient satisfaction" OR patient satisfaction[mesh])<br>AND<br>(dialysis OR "renal dialysis" OR renal dialysis[mesh] OR<br>hemodialysis)<br>AND<br>("patient reported outcomes" OR "patient reported outcome" OR<br>questionnaire OR instrument OR scale OR measure OR score OR<br>index) | ('patient reported outcome' OR 'patient reported outcomes' OR<br>'questionnaire'/exp OR questionnaire OR 'instrument'/exp OR<br>instrument OR scale OR measure OR score OR index)<br>AND<br>('dialysis'/exp OR 'renal replacement therapy'/exp OR<br>'hemodialysis'/exp)<br>AND<br>('quality of life'/exp OR symptom OR 'patient satisfaction'/exp) |

*Flythe et al, AJKD, "Patient-Reported Outcome Instruments for Physical Symptoms Among Patients Receiving Maintenance Dialysis: A Systematic Review"*
