# Supplementary material
Source: PubMed Central journal article supplement (PMC4658252)
Supplement: NIHMS704911-supplement-2.pdf [file NIHMS704911-supplement-2.pdf]

**Table S2.** Instrument validity and reliability testing.<sup>a</sup>

| Instrument                                                         | Content validity                                                                                                               | Construct validity <sup>b</sup>                                                                                                                                                                                                                                                                                               | Internal consistency reliability                                                                                             | Test-retest reliability                                                              | Responsiveness <sup>c</sup>                                                                                                   |
|--------------------------------------------------------------------|--------------------------------------------------------------------------------------------------------------------------------|-------------------------------------------------------------------------------------------------------------------------------------------------------------------------------------------------------------------------------------------------------------------------------------------------------------------------------|------------------------------------------------------------------------------------------------------------------------------|--------------------------------------------------------------------------------------|-------------------------------------------------------------------------------------------------------------------------------|
| <i>Developed in dialysis populations</i>                           |                                                                                                                                |                                                                                                                                                                                                                                                                                                                               |                                                                                                                              |                                                                                      |                                                                                                                               |
| 100 Category Checklist <sup>61, 72</sup>                           | Patient review ♦<br>Expert review                                                                                              | r= -0.24- -0.32 (p<0.05) for 9 of 40 body function categories and KDQOL kidney disease-targeted scales ♦■<br><br>Higher body function scores in patients with anemia (p<0.01) and higher body structure scores in patients with secondary hyperparathyroidism (p=<0.01) vs. in patients without ♦■<br>[known groups validity] | Cronbach's α=0.78 for body function, 0.50 for body structure, and 0.86 overall ♦■                                            | NR                                                                                   | NR                                                                                                                            |
| CHOICE Health Experience Questionnaire (CHEQ) <sup>13, 73</sup>    | Structural literature review<br>Patient focus groups ♦<br>Patient review ♦<br>Expert review <sup>13</sup>                      | Symptoms score=76 for PD and 78 for HD patients (p=NS)<br>Symptom scores=79 for ICED= 0-1, 75 for ICED=2, and 77 for ICED=3 (p=NS)<br>Sex score=67 for HD and 58 for PD patients (p≤0.01) <sup>13</sup> ♦■<br>[known groups validity]                                                                                         | Cronbach's α>0.7 for all multi-item scales except for time and quality of life ♦<br><br>ICC=0.81 (symptoms) <sup>73</sup> ♦■ | ICC= 0.55-0.79 (baseline, 1 year) <sup>73</sup> ♦                                    | NR                                                                                                                            |
| Curtin, et al. <sup>63</sup>                                       | Literature review<br>Patient interview <sup>63</sup> ♦                                                                         | r= -0.061- -0.460 (p<0.05) for >75% of instrument symptoms and MOS SF-36 PCS <sup>63</sup> ♦■                                                                                                                                                                                                                                 | Cronbach's α=0.78 for fatigue/sleep sub-index and 0.89 for sexual concerns sub-index <sup>63</sup> ♦■                        | NR                                                                                   | NR                                                                                                                            |
| Dialysis Symptom Index (DSI) <sup>19</sup>                         | Patient focus group ♦<br>Provider focus group<br>Existing instrument review<br>Patient review ♦<br>Expert review <sup>19</sup> | NR                                                                                                                                                                                                                                                                                                                            | NR                                                                                                                           | Kappa= 0.06-0.90 (mean 0.48 ± 0.22) <sup>19</sup> ♦■                                 | NR                                                                                                                            |
| Fluid Management Survey <sup>53</sup>                              | Patient focus group ♦<br>Expert review<br>Patient review <sup>53</sup> ♦                                                       | NR                                                                                                                                                                                                                                                                                                                            | Cronbach's α 0.72 (fluid-related symptoms) <sup>53</sup> ♦■                                                                  | Kappa= 0.53-0.88 (baseline, 2 weeks) <sup>53</sup> ♦                                 | NR                                                                                                                            |
| Hemodialysis Quality of Life Questionnaire (HQL) <sup>14, 64</sup> | Patient interviews ♦<br>Expert interviews<br>Patient review <sup>14</sup> ♦                                                    | NR                                                                                                                                                                                                                                                                                                                            | NR                                                                                                                           | ICC 0.91-0.95 (p<0.001 for all) for 5 domains (baseline, 6-8 weeks) <sup>14</sup> ♦■ | RR= 7.94 (Z=2.07) <sup>d</sup> for boredom; other symptoms non-significant (Kt/V <0.8, improve to Kt/V >1.0) <sup>14</sup> ♦■ |

| Instrument                                                             | Content validity                                                                 | Construct validity <sup>b</sup>                                                                                                                                                                                                                                                                                                                                                                                                                                                                                                                                                         | Internal consistency reliability                                                                                                                                                                                                           | Test-retest reliability                                                        | Responsiveness <sup>c</sup>                                                                                                                                                                                                                                                                                                                                                                                                                                                           |
|------------------------------------------------------------------------|----------------------------------------------------------------------------------|-----------------------------------------------------------------------------------------------------------------------------------------------------------------------------------------------------------------------------------------------------------------------------------------------------------------------------------------------------------------------------------------------------------------------------------------------------------------------------------------------------------------------------------------------------------------------------------------|--------------------------------------------------------------------------------------------------------------------------------------------------------------------------------------------------------------------------------------------|--------------------------------------------------------------------------------|---------------------------------------------------------------------------------------------------------------------------------------------------------------------------------------------------------------------------------------------------------------------------------------------------------------------------------------------------------------------------------------------------------------------------------------------------------------------------------------|
| Kidney Disease Quality of Life Instrument (KDQOL) <sup>12, 74-77</sup> | Literature review<br>Patient focus groups ♦<br>Expert focus groups <sup>12</sup> | F=22.5 for energy/fatigue and F=17.8 for symptom/problems scale displaying sensitivity to differences in the number of good days reported in a typical week <sup>f</sup><br><sup>78</sup> ♦■<br><i>[known groups validity]</i><br><br>r=0.62 for KDQOL symptoms/ problems and EuroQOL overall health rating;<br>r=0.76 for KDQOL overall health rating and EuroQOL overall health rating (p<0.05 for both) <sup>74</sup> ♦■<br><br>p<0.05 for symptoms/problems correlation with serum albumin (r=0.14) and change in GFR (r=0.17) (3m, 12m after dialysis initiation) <sup>74</sup> ♦■ | Cronbach's α 0.80 for symptom/ problems scale <sup>74</sup> ♦■<br><br>Cronbach's α 0.69 for dialysis-related symptoms; 0.79 for cardiopulmonary symptoms; 0.82 for sleep; 0.92 for energy; 0.73 for cramps; 0.66 appetite <sup>75</sup> ♦■ | NR                                                                             | ANOVA p<0.05 for dizziness, nausea, chest pain; other symptoms non-significant (conventional vs. high-flux dialysis) <sup>64</sup> ♦■<br><br>X <sup>2</sup> p>0.20 for differences in sexual questions baseline to 6 months for nocturnal HD (vs. conventional HD) <sup>76</sup> ♦■<br><br>Wilcoxon rank test p=0.50 for symptom score change and paired t-test p=0.03 for energy/fatigue from baseline to weeks 7 and 11 among HD patients treated with acupuncture <sup>77</sup> ♦■ |
| Kidney Disease Questionnaire (KDQ) <sup>11, 15, 65, 66</sup>           | Patient interviews ♦<br>Expert interviews <sup>15</sup>                          | r= -0.31 (p<0.01) for KDQ physical symptoms with Sickness Impact Profile physical component <sup>15</sup> ♦■                                                                                                                                                                                                                                                                                                                                                                                                                                                                            | reliability scores <sup>e</sup> >0.70 for all 5 dimensions <sup>66</sup> ♦■                                                                                                                                                                | ICC 0.85 (physical symptoms and fatigue) (baseline, 2 months) <sup>15</sup> ♦■ | ANOVA p<0.001 improvement in physical symptoms and fatigue in ESA-treated (vs. placebo) <sup>11, 15</sup> ♦■<br><br>ANOVA p<0.005 improvement in weakness, low energy, felt worn out, sluggish, and difficulty because of little strength in ESA-treated group (vs. placebo) <sup>65</sup> ♦■                                                                                                                                                                                         |
| Modified Edmonton                                                      | Patient survey <sup>79</sup> ♦                                                   | r= -0.69 (p<0.01) for overall symptom distress and KDQOL-SF symptom list                                                                                                                                                                                                                                                                                                                                                                                                                                                                                                                | Cronbach's α 0.61-0.81 <sup>48</sup> ■                                                                                                                                                                                                     | ICC= 0.53-0.71 (baseline, 1 week) <sup>5</sup> ♦■                              | r= -0.73 (p<0.01) for change in overall symptom distress                                                                                                                                                                                                                                                                                                                                                                                                                              |

| Instrument                                                                           | Content validity                                       | Construct validity <sup>b</sup>                                                                                                                                                                                                                                                                                                                                                                         | Internal consistency reliability                                                                                                               | Test-retest reliability                                        | Responsiveness <sup>c</sup>                                               |
|--------------------------------------------------------------------------------------|--------------------------------------------------------|---------------------------------------------------------------------------------------------------------------------------------------------------------------------------------------------------------------------------------------------------------------------------------------------------------------------------------------------------------------------------------------------------------|------------------------------------------------------------------------------------------------------------------------------------------------|----------------------------------------------------------------|---------------------------------------------------------------------------|
| Symptom Scale (mod-ESAS) <sup>5, 48, 49, 79, 80</sup>                                |                                                        | r= -0.19 - -0.56 (p<0.01) for ESAS-listed symptoms and KDQOL-SF physical health composite and r= -0.22 - -0.62 (p<0.01) for KDQOL-SF mental health composite <sup>5</sup> ◆■                                                                                                                                                                                                                            | Overall Cronbach's $\alpha$ 0.79 <sup>49</sup> ■<br>[both for non-modified Edmonton symptom scale]                                             |                                                                | score and change in KDQOL-SF symptom list (baseline, 6m) <sup>80</sup> ◆■ |
| National Kidney Dialysis and Kidney Transplantation Study (NKDKTS) <sup>16, 67</sup> | Patient review ◆<br>Patient interviews <sup>16</sup> ◆ | ANOVA p=0.02 across patients with different hemoglobin levels at different time-points, patients with lower hemoglobin had lower scores <sup>67</sup> ◆■<br>[known groups validity]                                                                                                                                                                                                                     | Cronbach's $\alpha$ 0.86 at baseline, 0.89 at 48 hours, 0.90 at 7 days; Cronbach's $\alpha$ decreased if any item was removed <sup>67</sup> ◆■ | ICC 0.59-0.82 (p<0.001) (baseline, 2 days) <sup>67</sup> ◆■    | NR                                                                        |
| Parfrey Symptom Assessment <sup>17</sup>                                             | Patient interviews ◆<br>Patient review <sup>17</sup> ◆ | ANOVA p=0.004 for symptom score difference between transplant and dialysis patients <sup>17</sup> ◆■<br>[known groups validity]                                                                                                                                                                                                                                                                         | NR                                                                                                                                             | NR                                                             | Symptom scores improved post-transplant (p=0.007) <sup>17</sup> ◆■        |
| Physical Symptom Distress Scale <sup>68</sup>                                        | Literature review<br>Expert review <sup>68</sup>       | r= -0.46 (p<0.0001) for overall scale and the KPS <sup>68</sup> ◆■                                                                                                                                                                                                                                                                                                                                      | Cronbach's $\alpha$ 0.87 <sup>68</sup> ◆                                                                                                       | ICC= 0.82 (baseline, 2 weeks) <sup>68</sup> ◆■                 |                                                                           |
| Short-Version Checklist <sup>62</sup>                                                | Patient review ◆<br>Expert review                      | r= 0.23- 0.43 (p<0.05) for 8 of 17 body function categories and KDQOL kidney disease-targeted scales ◆■<br><br>Higher body function scores in patients with carpal tunnel syndrome (p<0.05) and patients with anemia (p<0.01) and higher body structure scores in patients with carpal tunnel syndrome (p<0.01) and patients with anemia (p<0.05) vs. in patients without ◆■<br>[known groups validity] | Cronbach's $\alpha$ =0.79 overall ◆■                                                                                                           | NR                                                             | NR                                                                        |
| <b>Developed in non-dialysis populations</b>                                         |                                                        |                                                                                                                                                                                                                                                                                                                                                                                                         |                                                                                                                                                |                                                                |                                                                           |
| Bowel Disease Questionnaire <sup>81, 82</sup>                                        | Expert review<br>Patient review <sup>82</sup>          | NR                                                                                                                                                                                                                                                                                                                                                                                                      | NR                                                                                                                                             | Kappa= 0.56-0.86 (baseline, 1 week, and 7 weeks) <sup>81</sup> | NR                                                                        |
| European Organization for Research and                                               | Expert consensus <sup>83</sup>                         | r= 0.05- 0.35 (0.22, p<0.05 for fatigue and 0.35 for sleep disturbance, p<0.01) for EORTC-QLQ symptoms and HADS                                                                                                                                                                                                                                                                                         | Cronbach's $\alpha$ 0.86 (fatigue, pain, nausea/vomiting) <sup>84</sup> ■                                                                      | NR                                                             | NR                                                                        |

| Instrument                                                                              | Content validity                                                                             | Construct validity <sup>b</sup>                                                                                                                                                                                                                                                                                                                                                                                                                                     | Internal consistency reliability                                                                                                                                                                                                                                                                      | Test-retest reliability                                                                                      | Responsiveness <sup>c</sup>                                                                                                                                                |
|-----------------------------------------------------------------------------------------|----------------------------------------------------------------------------------------------|---------------------------------------------------------------------------------------------------------------------------------------------------------------------------------------------------------------------------------------------------------------------------------------------------------------------------------------------------------------------------------------------------------------------------------------------------------------------|-------------------------------------------------------------------------------------------------------------------------------------------------------------------------------------------------------------------------------------------------------------------------------------------------------|--------------------------------------------------------------------------------------------------------------|----------------------------------------------------------------------------------------------------------------------------------------------------------------------------|
| Treatment of Cancer Quality of Life Questionnaire (EORTC-QLQ-C30) <sup>20, 83, 84</sup> |                                                                                              | anxiety composite and $r=0.02-0.38$ (0.34 for fatigue, 0.28 for dyspnea, 0.38 for sleep disturbance, all $p<0.01$ ) for HADS depression composite <sup>84</sup> ■                                                                                                                                                                                                                                                                                                   |                                                                                                                                                                                                                                                                                                       |                                                                                                              |                                                                                                                                                                            |
| McGill Quality of Life Questionnaire (MQOL) <sup>18, 85, 86</sup>                       | Literature review<br>Expert experience<br>Patient interviews <sup>18</sup>                   | $r=0.56$ ( $p=0.0005$ ) for physical symptom subscale and Spitzer's health item <sup>18</sup> ■                                                                                                                                                                                                                                                                                                                                                                     | Cronbach's $\alpha$ 0.70 <sup>18</sup> and 0.62 <sup>85</sup> for physical symptom subscale ■                                                                                                                                                                                                         | ICC 0.69 for physical symptom subscale (baseline, 2 days) <sup>86</sup> ■                                    | NR                                                                                                                                                                         |
| Memorial Symptom Assessment Scale (MSAS) <sup>23, 87</sup>                              | Literature review <sup>23</sup>                                                              | $r=0.87$ for distress scores, $r=0.85$ for frequency scores, and $r=0.84$ with validation measures- FLIC, RAND distress, RAND well-being, KPS and mood VAS <sup>23</sup> ■<br><br>$r=-0.66$ for MSAS-GDI (4 psychological and 6 physical symptoms) and RAND well-being; $r=0.79$ for RAND distress; $r=-0.60$ for KPS <sup>23</sup> ■<br><br>MSAS-GDI scores= 0.93 for outpatients and 1.53 for inpatients ( $p<0.001$ ) <sup>23</sup> ■<br>[known groups validity] | Cronbach's $\alpha$ 0.88 (12 physical symptoms), 0.84 (pain symptoms), 0.75 (gastrointestinal distress), 0.58 (15 physical symptoms distinguished from other symptoms based on low frequency) <sup>23</sup> ■<br><br>Cronbach's $\alpha$ 0.84 (all questions); 0.65-0.75 (subscales) <sup>87</sup> ◆■ | NR                                                                                                           | NR                                                                                                                                                                         |
| Nottingham Health Profile (NHP) <sup>21, 45, 88</sup>                                   | NR                                                                                           | $r>0.7$ for energy (NHP) and physical symptoms and fatigue from KDQ <sup>45</sup> ◆■                                                                                                                                                                                                                                                                                                                                                                                | Cronbach's $\alpha$ 0.64-0.79 <sup>45</sup> ◆                                                                                                                                                                                                                                                         | $r=0.61-0.84$ (baseline, 2 weeks) <sup>45</sup> ◆■                                                           | McNemar $p=0.001$ for energy, $p=0.25$ for pain, and $p=0.12$ for sleep between baseline and 2 <sup>nd</sup> follow-up among HD patients treated with ESA <sup>88</sup> ◆■ |
| Palliative Care Outcome Symptom Scale-Renal (POS-S Renal) <sup>69</sup>                 | Literature review<br>Patient interviews<br>Expert interviews<br>Patient review <sup>69</sup> | $r=0.51$ ( $p=0.005$ ) POS and EORTC QLQ-C30 physical symptoms <sup>69</sup>                                                                                                                                                                                                                                                                                                                                                                                        | Cronbach's $\alpha$ 0.65 <sup>69</sup>                                                                                                                                                                                                                                                                | Kappa= 0.10-0.43 for symptom-related items (consecutive visits, interval time not specified) <sup>69</sup> ■ | NR                                                                                                                                                                         |
| Quality of Life at the End of Life (QUAL-E) <sup>89, 90</sup>                           | Patient interviews ◆<br>Family interviews<br>Patient review ◆                                | $r=0.23$ ( $p<0.01$ ) QUAL-E symptoms and FACIT physical well-being subscale <sup>90</sup> ◆                                                                                                                                                                                                                                                                                                                                                                        | Cronbach's $\alpha$ 0.87 for symptom impact <sup>90</sup> ◆■                                                                                                                                                                                                                                          | ICC=0.23 for symptom impact (baseline, 1 week) <sup>90</sup> ◆■                                              | NR                                                                                                                                                                         |

| Instrument                                                                  | Content validity                                        | Construct validity <sup>b</sup>                                                                                                                                                                                                                                                                      | Internal consistency reliability                                                                                                    | Test-retest reliability                                                                  | Responsiveness <sup>c</sup> |
|-----------------------------------------------------------------------------|---------------------------------------------------------|------------------------------------------------------------------------------------------------------------------------------------------------------------------------------------------------------------------------------------------------------------------------------------------------------|-------------------------------------------------------------------------------------------------------------------------------------|------------------------------------------------------------------------------------------|-----------------------------|
|                                                                             | Family member review<br>Expert review <sup>89, 90</sup> | r= -0.12 (p=NS) QUAL-E symptoms and Missoula-VITAS QOL Index symptom subscale <sup>90</sup> ♦                                                                                                                                                                                                        |                                                                                                                                     |                                                                                          |                             |
| Quality of Well Being Self-Administered Scale (QWB-SA) <sup>70, 91-94</sup> | NR                                                      | r= -0.45 (p<0.01) QWB-SA and Sickness Impact Profile total score <sup>70</sup>                                                                                                                                                                                                                       | NR                                                                                                                                  | r=0.77 (baseline, 1 month) <sup>92</sup><br><br>r=0.80-0.97 (day 1, day 2) <sup>94</sup> | NR                          |
| Rotterdam Symptom Checklist (RSCL) <sup>22, 71, 95, 96</sup>                | Literature review<br>Expert review <sup>71</sup>        | r= -0.67 (p=0.001) RSCL physical symptom distress and Medical Outcome Study (MOS-20) physical function <sup>71</sup>                                                                                                                                                                                 | Cronbach's $\alpha$ 0.82 for physical distress scale <sup>22</sup> ■<br><br>Cronbach's $\alpha$ 0.68-0.85 at baseline <sup>95</sup> | NR                                                                                       | NR                          |
| Symptom Distress Scale (SDS) <sup>23, 44, 97-100</sup>                      | Literature review<br>Patient interviews <sup>97</sup>   | r=0.60 (p==x) SDS and Sickness Impact Profile <sup>99</sup> ■<br><br>r=0.65 (p=x) SDS and KPS <sup>100</sup> ■<br><br>p<0.002: more symptom distress in hospitalized vs. non-hospitalized patients and p<0.0001 in low vs. high performance status <sup>23</sup> ■<br><i>[known groups validity]</i> | Cronbach's $\alpha$ 0.70-0.92 in over 40 studies in different populations <sup>44</sup> ■                                           | ICC=0.78 (baseline, 1 month) <sup>44</sup> ■                                             | NR                          |

<sup>a</sup> Results for symptom-specific domains and questions reported when available. ESRD population specific data reported when available.

<sup>b</sup> Construct validity reported as congruent validity unless otherwise noted.

<sup>c</sup> Responsiveness to change reported only when tested in a dialysis population.

<sup>d</sup> Relative risk of an increase of 1 unit for patients with an increase in Kt/V from <0.8 to >1.0 compared to those with stable Kt/V >1.0.

<sup>e</sup> Type of reliability score not characterized.

<sup>f</sup> F-ratios from 1-way ANOVA with KDQOL subscales for 6 different known group classifications.

♦ = tested in a dialysis population

■ = specifically evaluated for the symptom domain/ questions

Abbreviations: ESRD, end stage renal disease; PD, peritoneal dialysis, NS, non-significant; ICED, index of coexistent disease; MOS SF-36 PCS, Medical Outcomes Study Short Form Physical Component Summary; HADS, Hospital Anxiety and Depression scale; RAND well-being, Revised Rand Mental Health Inventory- positive affect; RAND distress, Revised Rand Mental Health Inventory- psychological distress; KPS, Karnofsky Performance Status Scale.
