# Supplementary material
Source: PubMed Central journal article supplement (PMC4658252)
Supplement: NIHMS704911-supplement-3.pdf [file NIHMS704911-supplement-3.pdf]

**Table S3.** Instrument intended population, recall periods, and symptom attributes assessed.

| Instrument <sup>a</sup>                                   | Intended population | Symptom number <sup>a</sup> | Recall period <sup>b</sup>    | Symptom attributes <sup>b</sup>                                                                                                                                                                                    | Symptom frequency <sup>b</sup>                                        | Symptom timing/duration <sup>b</sup>                 |
|-----------------------------------------------------------|---------------------|-----------------------------|-------------------------------|--------------------------------------------------------------------------------------------------------------------------------------------------------------------------------------------------------------------|-----------------------------------------------------------------------|------------------------------------------------------|
| <i>Developed in dialysis populations</i>                  |                     |                             |                               |                                                                                                                                                                                                                    |                                                                       |                                                      |
| 100 Category Checklist                                    | ESRD                | 35                          | U/K                           | None                                                                                                                                                                                                               | --                                                                    | --                                                   |
| CHOICE Health Experience Questionnaire (CHEQ)             | ESRD                | 17                          | 4 weeks (16);<br>3 months (1) | Bother (13)<br>(not at all - extremely)<br>Severity (2)<br>(none - very severe)<br>Interference (1)<br>(not at all - extremely)<br>Problem (3)<br>(not a problem - severe)                                         | none of time - all of time<br>(8)                                     | During dialysis (13)<br>None (4)                     |
| Curtin, <i>et al.</i>                                     | ESRD                | 47                          | 4 weeks                       | None                                                                                                                                                                                                               | never - all of time                                                   | --                                                   |
| Dialysis Symptom Index (DSI)                              | ESRD                | 30                          | Past week                     | Bother<br>(not at all - very much)                                                                                                                                                                                 | --                                                                    | --                                                   |
| Fluid management Survey                                   | ESRD                | 10                          | Past 2 weeks                  | Bother (8)<br>(not at all - extremely)                                                                                                                                                                             | every day - never over past<br>2 weeks (1)<br>all of time - never (1) | Intradialytic or<br>following dialysis (4)           |
| Hemodialysis Quality of Life Questionnaire (HQL)          | ESRD                | 51                          | U/K                           | U/K                                                                                                                                                                                                                | U/K                                                                   | Intradialytic (14)<br>Interdialytic (20)<br>U/K (17) |
| Kidney Disease Quality of Life Instrument (KDQOL)         | ESRD                | 30                          | Past 4 weeks                  | Severity (1)<br>(none - very severe)<br>Interference (1)<br>(not at all - extremely)<br>Bother (12)<br>(not at all - extremely)<br>Problem (2)<br>(not a problem - severe)<br>Rating (1)<br>(very bad - very good) | all of time - none of time<br>(13)<br>None (17)                       | --                                                   |
| Kidney Disease Questionnaire (KDQ)                        | ESRD                | patient-specific (6)        | Past 2 weeks                  | U/K                                                                                                                                                                                                                | U/K                                                                   | --                                                   |
| Modified Edmonton Symptom Assessment System (mod-ESAS)    | ESRD                | 10 + patient-specific (1)   | Presently                     | Severity<br>(none - worst possible)                                                                                                                                                                                | --                                                                    | --                                                   |
| National Kidney Dialysis and Kidney Transplantation Study | ESRD                | 13                          | Last month;<br>Last dialysis  | None                                                                                                                                                                                                               | never - often                                                         | After last dialysis<br>(present/absent)              |

| (NKDKTS)                                                                                                 |                                         |                           |                    |                                                                                                                                                                                     |                                 |                                                                        |
|----------------------------------------------------------------------------------------------------------|-----------------------------------------|---------------------------|--------------------|-------------------------------------------------------------------------------------------------------------------------------------------------------------------------------------|---------------------------------|------------------------------------------------------------------------|
| Parfrey Symptom Assessment                                                                               | ESRD                                    | 12 +                      | Previous few weeks | Severity (absent - very)<br>[Additional qualifiers (+1 point for each): requires medication, causes sleep and/or daily activity interference, relief would improve quality of life] | +1 point if every day           | Duration +1 point if >1 hour<br><br>Relationship to dialysis procedure |
| Physical Symptom Distress Scale                                                                          | ESRD                                    | 16                        | Past week          | Bother (not at all - extremely)                                                                                                                                                     | --                              | --                                                                     |
| Short-Version Checklist                                                                                  | ESRD                                    | 22                        | U/K                | None                                                                                                                                                                                | --                              | --                                                                     |
| <i>Developed in non-dialysis populations</i>                                                             |                                         |                           |                    |                                                                                                                                                                                     |                                 |                                                                        |
| Bowel Disease Questionnaire <sup>c</sup>                                                                 | Patients with gastrointestinal symptoms | 17 <sup>c</sup>           | Last year          | Bother (not a problem - extremely bothersome when occurs)                                                                                                                           | not a problem - occurs daily    | --                                                                     |
| European Organization for Research and Treatment of Cancer Quality of Life Questionnaire (EORTC-QLQ-C30) | Cancer                                  | 18                        | Past week          | Burden (not at all - very much)                                                                                                                                                     | --                              | --                                                                     |
| McGill Quality of Life Questionnaire (MQOL)                                                              | Advanced disease                        | patient-specific (3)      | Past 2 days        | Problem (no problem - tremendous problem)                                                                                                                                           | --                              | --                                                                     |
| Memorial Symptom Assessment Scale (MSAS)                                                                 | Cancer                                  | 32 + patient-specific (3) | Past week          | Severity (32) (slight - very)<br>Bother (not at all - very much)                                                                                                                    | rarely - almost constantly (24) | --                                                                     |
| Nottingham Health Profile (NHP)                                                                          | General                                 | 33                        | Presently          | Present/ absent                                                                                                                                                                     | None                            | None                                                                   |
| Palliative Care Outcome Symptom Scale- Renal (POS-S Renal)                                               | Kidney disease                          | 17 + patient-specific (3) | Past week          | Bother (not at all - overwhelmingly)                                                                                                                                                | --                              | --                                                                     |
| Quality of Life at the End of Life (QUAL-E)                                                              | General/ end of life                    | patient-specific (3)      | Past week          | Severity (very mild - very)<br>Interference (not at all - completely)                                                                                                               | rarely - most of time           | --                                                                     |
| Quality of Well Being Self-Administered Scale (QWB-SA)                                                   | General                                 | 58 + patient-specific (2) | Last 3 days (39)   | absence/ presence (19)                                                                                                                                                              | --                              | No days - 3 days ago (39)                                              |

|                                    |        |    |           |                                                 |                                 |    |
|------------------------------------|--------|----|-----------|-------------------------------------------------|---------------------------------|----|
| Rotterdam Symptom Checklist (RSCL) | Cancer | 30 | Past week | Bother<br>(not at all - very much)              | --                              | -- |
| Symptom distress scale (SDS)       | Cancer | 10 | Lately    | Severity (4)<br>(scales are symptom - specific) | (scales vary by symptom)<br>(8) | -- |

<sup>a</sup> Excludes mood or emotional symptoms.

<sup>b</sup> Varies by symptom in some instruments. If formats vary across symptoms, number of symptoms with specified format noted in parentheses.

<sup>c</sup> Instrument contains a non-gastrointestinal symptom checklist at the end of the instrument which is the basis for this report.

Key and abbreviations: --, not reported; u/k, unknown; ESRD, end stage renal disease.
