# Supplementary material
Source: PubMed Central journal article supplement (PMC4658252)
Supplement: NIHMS704911-supplement-4.pdf [file NIHMS704911-supplement-4.pdf]

**Table S4.** Summary of validity and reliability testing in instruments assessing physical symptoms.<sup>a</sup>

|                      | Instrument Target Populations, n (%) |                                |                         |                                |                      |                                |
|----------------------|--------------------------------------|--------------------------------|-------------------------|--------------------------------|----------------------|--------------------------------|
|                      | Generic<br>(n=10)                    |                                | ESRD-specific<br>(n=13) |                                | Total<br>(N=23)      |                                |
|                      | Overall <sup>b</sup>                 | Symptom<br>domain <sup>c</sup> | Overall <sup>b</sup>    | Symptom<br>domain <sup>c</sup> | Overall <sup>b</sup> | Symptom<br>domain <sup>c</sup> |
| <b>Validity</b>      |                                      |                                |                         |                                |                      |                                |
| Content              | 1 (10.0%)                            | 1 (10.0%)                      | 12 (92.3%)              | 12 (92.3%)                     | 13 (56.5%)           | 13 (56.5%)                     |
| Construct            |                                      |                                |                         |                                |                      |                                |
| Congruent            | 9 (90.0%)                            | 8 (80.0%)                      | 7 (53.8%)               | 7 (53.8%)                      | 16 (70.0%)           | 15 (65.2%)                     |
| Known groups         | 2 (20.0%)                            | 2 (20.0%)                      | 6 (46.2%)               | 6 (46.2%)                      | 8 (34.8%)            | 8 (34.8%)                      |
| Responsiveness       | 1 (10.0%)                            | 1 (10.0%)                      | 6 (46.2%)               | 6 (46.2%)                      | 7 (30.4%)            | 7 (30.4%)                      |
| <b>Reliability</b>   |                                      |                                |                         |                                |                      |                                |
| Internal consistency | 8 (80.0%)                            | 6 (60.0%)                      | 10 (76.9%)              | 10 (76.9%)                     | 18 (78.3%)           | 16 (69.6%)                     |
| Test-retest          | 7 (70.0%)                            | 5 (50.0%)                      | 8 (61.5%)               | 6 (46.2%)                      | 15 (65.2%)           | 11 (47.8%)                     |

<sup>a</sup> All psychometric measures except for content validity were deemed present if assessed quantitatively. Content validity was deemed present if a clear description of the measurement aim was provided and if dialysis patients were involved in instrument item development. Responsiveness was deemed present only if analyzed in an ESRD population.

<sup>b</sup> Psychometric property assessed for any domain or for instrument overall.

<sup>c</sup> Psychometric property assessed for symptom-specific domain.

Abbreviations: ESRD, end stage renal disease.
